# Supplementary material for: Oncolytic reovirus inhibits angiogenesis through induction of CXCL10/IP-10 and abrogation of HIF activity in soft tissue sarcomas
Source: PubMed Central journal article supplement (PMC5689724; doi:10.18632/oncotarget.21423), 2017-09-30
Supplement: oncotarget-08-86769-s001.pdf [file oncotarget-08-86769-s001.pdf]

## Oncolytic reovirus inhibits angiogenesis through induction of CXCL10/IP-10 and abrogation of HIF activity in soft tissue sarcomas

### SUPPLEMENTARY MATERIALS

Supplementary Table 1: RAS mutations in sarcoma cell lines

| Cell Line | N-RAS | nt Change |
|-----------|-------|-----------|
| HT-1080   | Q61K  | CAA > AAA |
| A673      | WT    | N/A       |
| RH30      | WT    | N/A       |
| SK-LMS-1  | WT    | N/A       |

**Supplementary Table 2: Up-regulated genes following Reovirus treatment HT-1080 genes up-regulated following Reovirus treatment**

See Supplementary File 1

**Supplementary Table 3: Up-regulated genes following Reovirus treatment SK-LMS-1 genes up-regulated following Reovirus treatment**

See Supplementary File 2
